# Supplementary material
Source: PubMed Central journal article supplement (PMC384805)

(a)

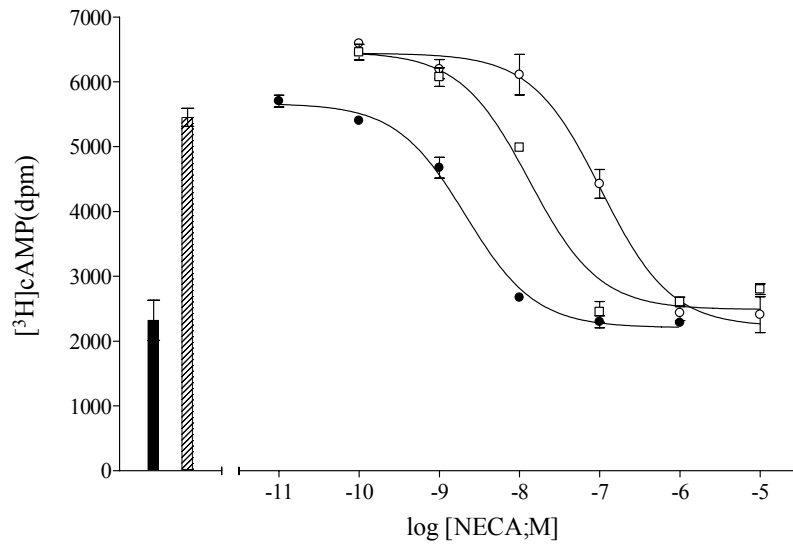

(b)

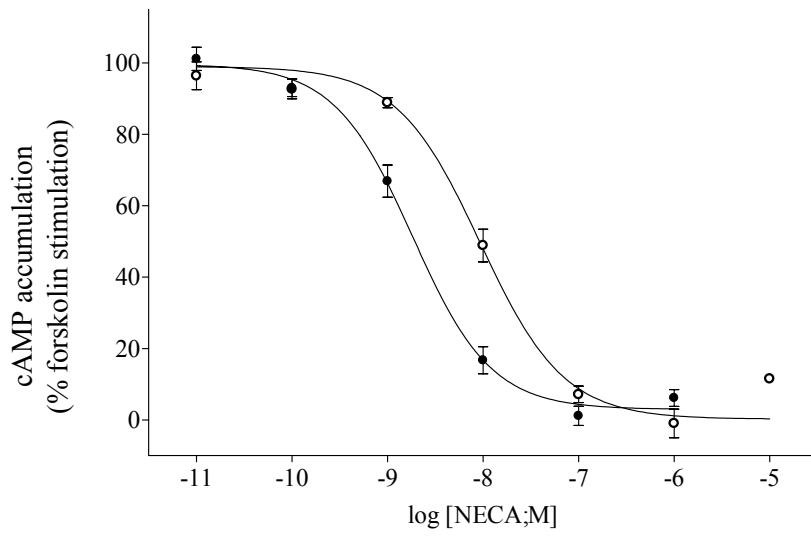

(c)

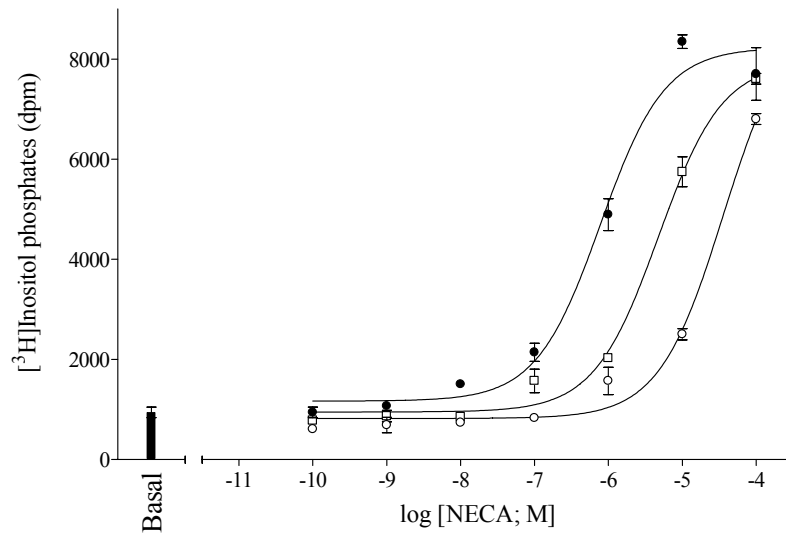

Supplement: pnas_101_13_4673__4.pdf [file pnas_101_13_4673__4.pdf]
